# Supplementary material for: Autofluorescent micelles self-assembled from an AIE-active luminogen containing an intrinsic unconventional fluorophore
Source: Royal Society of Chemistry journal article supplement (doi:10.1039/c5sm03048j), 2016-01-01
Supplement: c5sm03048j1.pdf [file c5sm03048j1.pdf]

## Autofluorescent Micelles Self-assembled from an AIE-active Luminogen Containing Intrinsic Unconventional Fluorophore

Chunyan Liu,\* Qingbao Cui, Jing Wang, Yang Liu and Jing Chen

Fig. S1 a)  $^1\text{H}$  NMR spectrum and  $^{13}\text{C}$  NMR spectrum. b) IR spectra. c) Mass spectra

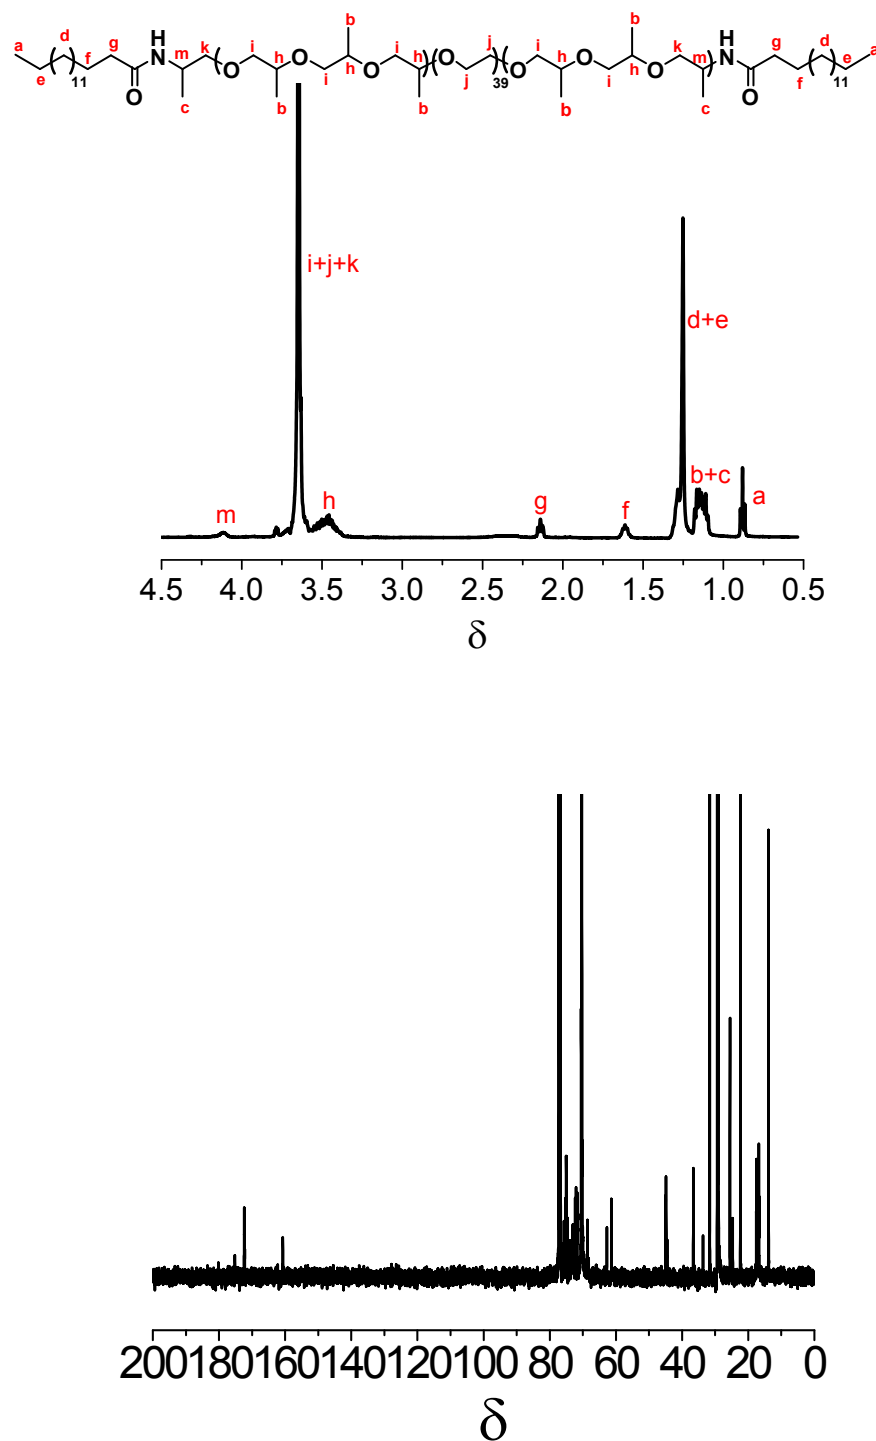

(a)

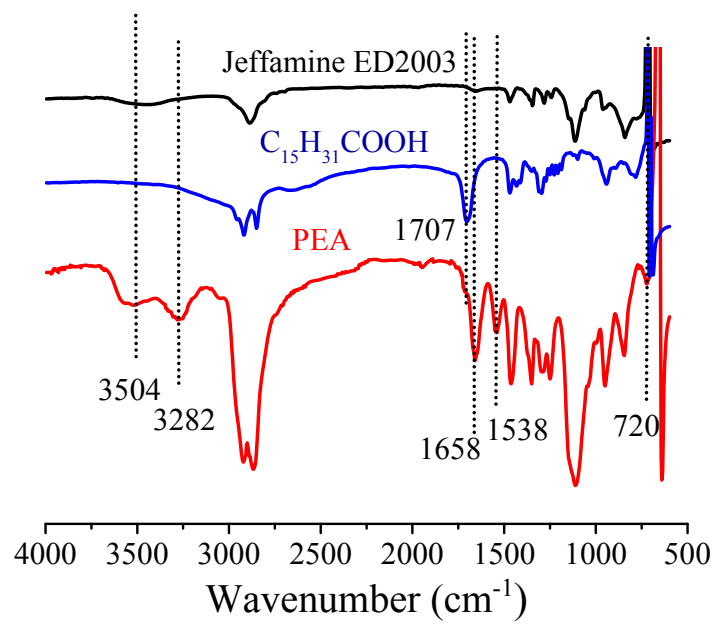

(b)

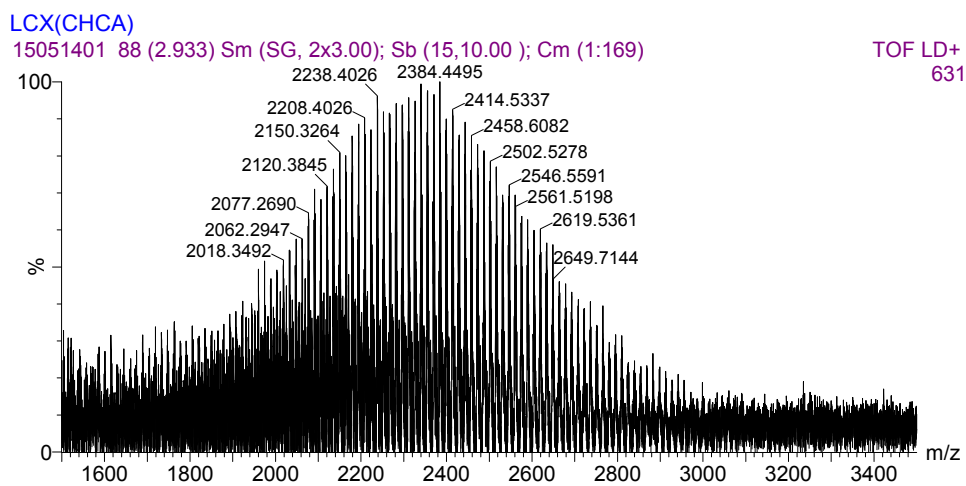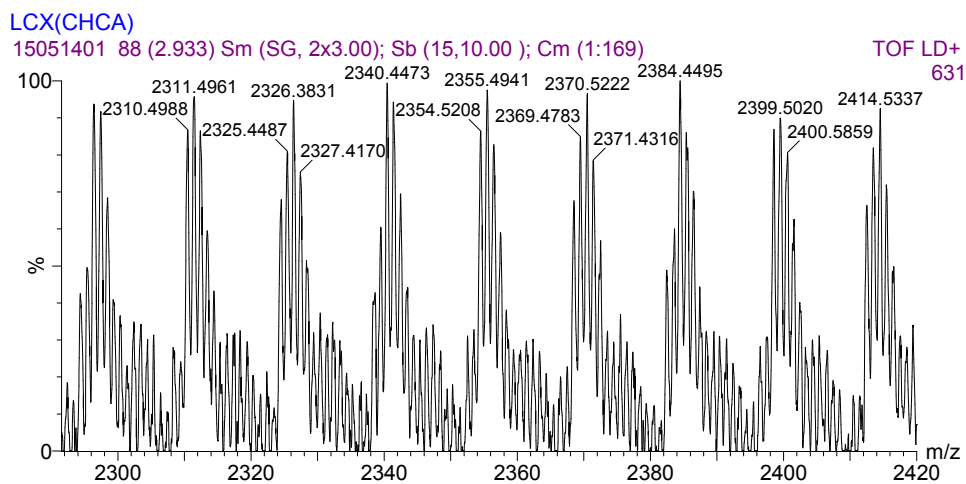

(c)

Fig. S2 Plot of surface tension ( $\gamma$ ) versus PEA concentration.

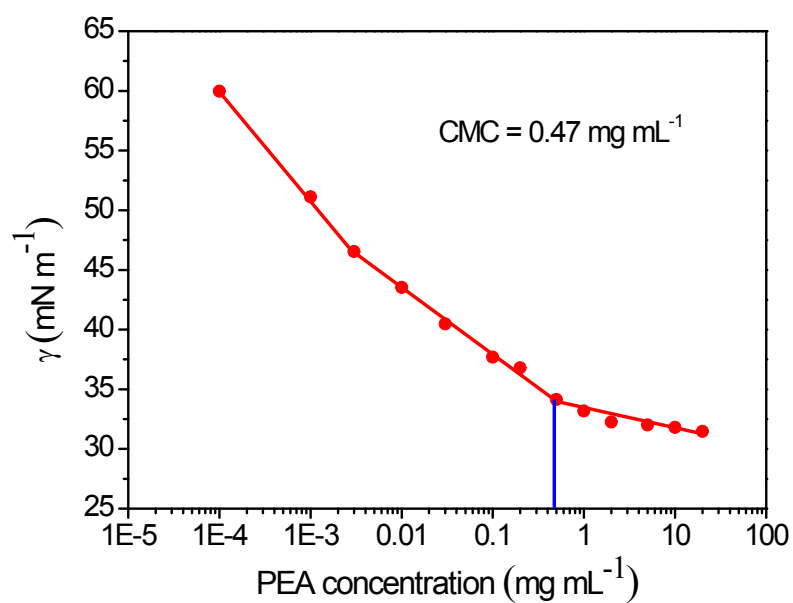

**Fig. S3** Time-resolved emission-decay curve of PEA micelles solution.

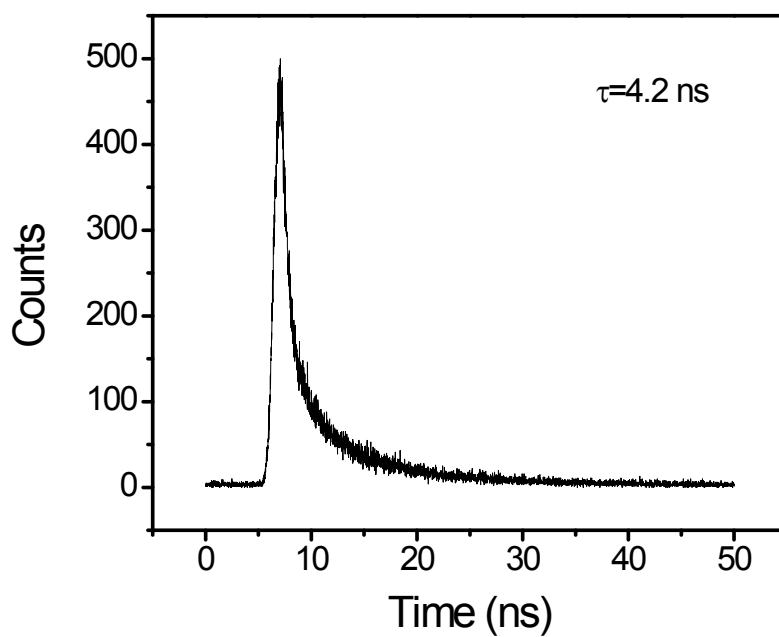

**Fig. S4** FL quantum yields of PEA in the solution and aggregated micelles solutions.

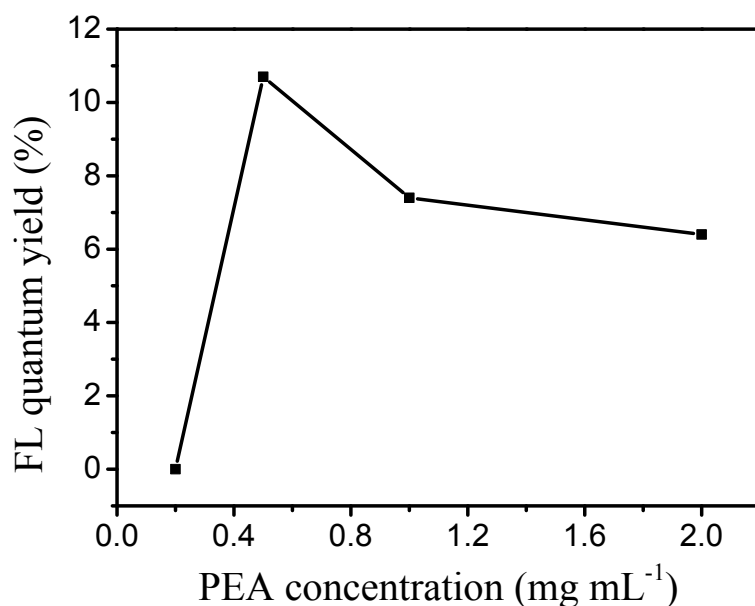

## Experimental Section

*Materials:* Palmitic acid and Petroleum ether were purchased from Sinopharm Chemical Reagent Co. Ltd. O,O'-Bis(2-aminopropyl) polypropylene glycol-block-polyethylene glycol-block-polypropylene glycol (trade name Jeffamine ED2003 (XTJ-502), average  $M_n \sim 1900 \text{ g mol}^{-1}$ ) was supplied by Sigma-Aldrich. Deionized water was obtained using a Milli-Q water purification system. All agents were used directly without further purification.

*Measurements:* The FT-IR spectra were recorded on a Bruker-AXS TENSOR 27 FT-IR spectrometer. The sample for infrared analysis was prepared by casting a film onto a potassium bromide (KBr) window from a  $2 \text{ mg mL}^{-1}$  PEA micelles solution. After evaporation of the majority of the solvent at room temperature the sample was placed under vacuum in an oven at  $100^\circ\text{C}$  to remove residual water. NMR spectra were carried out on a Bruker AC-80 NMR instrument, operating at 500 MHz. Mass spectra were obtained on a MALDI TOF Mass Spectrometer (Waters Corp., USA). Equilibrium surface tensions were measured using the lifting circle method on a K100C tensiometer (Krüss, Germany). The measuring accuracy of the device as reported by the manufacturer is  $\pm 0.1 \text{ mN m}^{-1}$ . Each reported value of surface tension was the average of three measurements that were taken after allowing each of the solutions to equilibrate in the instrument fixed at  $20^\circ\text{C}$ . The sizes of micelles in water were determined by Malvern Zetasizer Nano-ZS dynamic light scattering (DLS) equipped with 633 nm He-Ne laser source at room temperature. Transmission electron microscopy (TEM) images were recorded on a Hitachi H-600 electron microscope operated at 120 kV. The samples for TEM measurements were prepared by dropping a drop of  $2 \text{ mg mL}^{-1}$  PEA micelle solution onto a copper grid and allowed to dry. SEM images were taken on a Hitachi SU8010 microscope. UV-visible absorption spectra were recorded at room temperature on a UV/Vis lambda 35 spectrometer using quartz cuvettes of 1 cm path length. Fluorescence spectra were measured at room temperature on a Hitachi F-7000 Fluorescence (FL) Spectrophotometer with a slit width of 5 nm for both excitation and emission. Weight percentages of carbon, hydrogen, and nitrogen atoms in product were assessed by elemental analysis using a PE 2400CHN elemental analyzer.

*Synthesis of PEA:* A mixture of Jeffamine ED2003 and palmitic acid (molar ratio is 1:2.1) was heated at 180 °C for 7~8 h. The reaction mixture was then cooled to room temperature. A brown solid product (named PEA, O,O'-Bis(2- palmitamidopropyl) polypropylene glycol-block-polyethylene glycol-block-polypropylene glycol) was obtained, after filtration and washing with petroleum ether, and dried overnight in an oven at 100 °C. <sup>1</sup>H NMR (500 MHz, CDCl<sub>3</sub>): δ 0.88 (t, *J* = 6.75 Hz, 6H; CH<sub>3</sub>-CH<sub>2</sub>), 1.09~1.18 (m, 21H; CH<sub>3</sub>-CH), 1.25~1.28 (m, 48H; CH<sub>2</sub>-alkyl chain), 1.61 (m, 4H; CH<sub>2</sub> in β of CO group), 2.14 (t, *J* = 8.45 Hz, 4H; CH<sub>2</sub> in α of CO group), 3.38~3.55 (m, 5H; CH-OCH<sub>2</sub>), 3.60~3.69 (m, 170H; CH<sub>2</sub>O), 4.11 (m, 2H; CH-NH).

From FT-IR spectroscopy of PEA, both the free and the hydrogen-bonded N-H stretching bands located at 3504 cm<sup>-1</sup> and 3282 cm<sup>-1</sup>, respectively, and C=O stretching (amide I) band located at 1658 cm<sup>-1</sup> from the amide groups were found. Stretching vibration of C=O shifts from 1707 cm<sup>-1</sup> (in COOH) to 1658 cm<sup>-1</sup> (in CONH). The scissoring vibration of N-H located at 1538 cm<sup>-1</sup> and scissoring vibration of alkyl chain [-(CH<sub>2</sub>)<sub>n</sub>, n ≥ 4] located at 720 cm<sup>-1</sup> were also observed.

Elemental analysis calculated (%) for C<sub>131</sub>H<sub>262</sub>N<sub>2</sub>O<sub>47</sub>: C 60.14, H 10.02, N 1.07; found: C 59.68, H 10.04, N 1.08.
